# Supplementary material for: What Do We Learn from Spheroid Culture Systems? Insights from Tumorspheres Derived from Primary Colon Cancer Tissue
Source: PubMed Central journal article supplement (PMC4706382; doi:10.1371/journal.pone.0146052), 2016-01-08
Supplement: pone.0146052.s008.pdf [file pone.0146052.s008.pdf]

**S1A Table. Primary and secondary antibodies used for immunofluorescence analysis.**

| Antibody                                 | References           |
|------------------------------------------|----------------------|
| anti-SOX2 (1:50)                         | (Abcam, ab97959)     |
| anti-OCT4 (1:50)                         | (Abcam, ab18976)     |
| anti-LGR5 (1:50)                         | (Abcam, 75732)       |
| anti-CK20 [Ks20.8] (1:200)               | (Genetex, GTX72046)  |
| Alexa fluor 594 goat anti-rabbit (1:500) | (Invitrogen, A11012) |
| Alexa fluor 488 goat anti-mouse (1:500)  | (Invitrogen, A10667) |

**S1B Table. Primary antibodies and isotype controls used for FACS analysis.**

| Antibody          | References                   | Isotype control        | References                   |
|-------------------|------------------------------|------------------------|------------------------------|
| CD133 (AC133) APC | Miltenyi Biotec, 130-090-826 | Mouse IgG1-APC         | Miltenyi Biotec, 130-090-214 |
| CD44 PE-Cy7       | BD Biosciences, 560533       | PE-Cy™7 Mouse IgG2b, κ | BD Biosciences, 560542       |
| CD24 FITC         | BD Biosciences, 555427       | FITC Mouse IgG2a, κ    | BD Biosciences, 556652       |
| CD24 PE           | BD Biosciences, 555428       | PE Mouse IgG2a, κ      | BD Biosciences, 555574       |

**S1C Table. Primer pairs used for RT-qPCR.**

| Gene               | Forward                               | Reverse                               |
|--------------------|---------------------------------------|---------------------------------------|
| OCT4 (POU5F1)      | 5'-GAG-AAC-CGA-GTG-AGA-GGC-AAC-C-3'   | 5'-CAT-AGT-CGC-TGC-TTG-ATC-GCT-TG-3'  |
| NANOG              | 5'-AAT-ACC-TCA-GCC-TCC-AGC-AGA-TG-3'  | 5'-TGC-GTC-ACA-CCA-TTG-CTA-TTC-TTC-3' |
| SOX2               | 5'-AGG-GGG-AAA-GTA-GTT-TGC-TGC-CT-3'  | 5'-TGC-CGC-CGC-CGA-TGA-TTG-TT-3'      |
| LGR5               | 5'-AGC-CAT-GAC-CTT-GGC-CCT-GA-3'      | 5'-GCT-GTG-GAG-CCC-ATC-AAA-GCA-3'     |
| EFF1A1             | 5'-TTG-TCG-TCA-TTG-GAC-ACG-TAG-3'     | 5'-TGC-CAC-CGC-ATT-TAT-AGA-TCA-G-3'   |
| B-Actin            | 5'-GCA-AAG-ACC-TGT-ACG-CCA-ACA-3'     | 5'-ACA-CGG-AGT-ACT-TGC-GCT-CAG-3'     |
| 28S                | 5'-GAA-CTT-TGA-AGG-CCG-AAG-TG-3'      | 5'-ATC-TGA-ACC-CGA-CTC-CCT-TT-3'      |
| YWHAZ              | 5'-ACT-TTT-GGT-ACA-TTG-TGG-CTT-CAA-3' | 5'-CCG-CCA-GGA-CAA-ACC-AGT-AT-3'      |
| CTNNB1 (β-catenin) | 5'-GTG-CTA-TCT-GTC-TGC-TCT-AGT-A-3'   | 5'-CTT-CCT-GTT-TAG-TTG-CAG-CAT-C-3'   |
