# Supplementary material for: What Do We Learn from Spheroid Culture Systems? Insights from Tumorspheres Derived from Primary Colon Cancer Tissue
Source: PubMed Central journal article supplement (PMC4706382; doi:10.1371/journal.pone.0146052), 2016-01-08
Supplement: pone.0146052.s009.pdf [file pone.0146052.s009.pdf]

**S2 Table. Patient Characteristics.**

| Patients | Age/sex | Tumor site            | TNM Stages  |          | Tumor differentiation | Liver metastasis | MSS/MSI status |
|----------|---------|-----------------------|-------------|----------|-----------------------|------------------|----------------|
| T6       | 84/m    | left descending colon | Stage III C | T4aN2a   | moderate              | no               | MSS            |
| T18      | 82/m    | right ascending colon | Stage II A  | T3N0     | well                  | no               | MSS            |
| T20      | 79/m    | transverse colon      | Stage IV A  | T3N2bM1a | moderate              | yes              | MSS            |
| T29      | 70/f    | colon left angle      | Stage II A  | T3N0     | well                  | no               | MSS            |
| T35      | 80/m    | rectum                | Stage III B | T3N1b    | well                  | no               | MSS            |

**T:** Primary Tumor, **N:** Regional Lymph Nodes, **M:** Distant Metastasis, **MSS:** Microsatellite stability
