# Supplementary material for: What Do We Learn from Spheroid Culture Systems? Insights from Tumorspheres Derived from Primary Colon Cancer Tissue
Source: PubMed Central journal article supplement (PMC4706382; doi:10.1371/journal.pone.0146052), 2016-01-08
Supplement: pone.0146052.s010.pdf [file pone.0146052.s010.pdf]

**S3 Table. *In vitro* limiting dilution assays of CRC spheroid cultures - Sphere forming cell (SFC) frequency.**

|                     | P1                   |                 |       | P2                   |                 |       | P3                   |                 |       |
|---------------------|----------------------|-----------------|-------|----------------------|-----------------|-------|----------------------|-----------------|-------|
| Colon cancer sample | SFC frequency 1 in x |                 |       | SFC frequency 1 in x |                 |       | SFC frequency 1 in x |                 |       |
|                     | Lower                | <b>Estimate</b> | Upper | Lower                | <b>Estimate</b> | Upper | Lower                | <b>Estimate</b> | Upper |
| T6                  | 12.19                | <b>9.14</b>     | 6.85  | 11.46                | <b>7.51</b>     | 4.92  | 20.10                | <b>11.66</b>    | 6.77  |
| T18                 | 13.09                | <b>8.47</b>     | 5.48  | 7.15                 | <b>4.54</b>     | 2.88  | 6.32                 | <b>4.45</b>     | 3.13  |
| T20                 | 1.78                 | <b>1.57</b>     | 1.40  | 3.15                 | <b>2.03</b>     | 1.43  | 2.09                 | <b>1.75</b>     | 1.49  |
| HT29                | 3.21                 | <b>2.54</b>     | 2.01  | 2.68                 | <b>2.13</b>     | 1.69  | 1.58                 | <b>1.28</b>     | 1.03  |
| HCT116              | 2.76                 | <b>2.26</b>     | 1.85  | 3.49                 | <b>2.69</b>     | 2.08  | 12.0                 | <b>7.9</b>      | 5.19  |
