# Supplementary material for: What Do We Learn from Spheroid Culture Systems? Insights from Tumorspheres Derived from Primary Colon Cancer Tissue
Source: PubMed Central journal article supplement (PMC4706382; doi:10.1371/journal.pone.0146052), 2016-01-08
Supplement: pone.0146052.s011.pdf [file pone.0146052.s011.pdf]

| <b>S4 Table. <i>In vivo</i> limiting dilution assays of CRC spheroid cultures – number of injected cells from dissociated spheroids and tumor formation occurrence in mice.</b> |                                         |                           |                         |                         |           |           | <b><i>In vivo</i> limiting dilution assays of CRC spheroid cultures – cancer initiating cell (C-IC) frequency</b> |                 |       |
|---------------------------------------------------------------------------------------------------------------------------------------------------------------------------------|-----------------------------------------|---------------------------|-------------------------|-------------------------|-----------|-----------|-------------------------------------------------------------------------------------------------------------------|-----------------|-------|
|                                                                                                                                                                                 | Cell number injected into NOD/SCID mice |                           |                         |                         |           |           | C-IC frequency 1 in x                                                                                             |                 |       |
| CRC sample                                                                                                                                                                      | <b>1*10<sup>4</sup></b>                 | <b>2.5*10<sup>3</sup></b> | <b>1*10<sup>3</sup></b> | <b>1*10<sup>2</sup></b> | <b>50</b> | <b>10</b> | Lower                                                                                                             | <b>Estimate</b> | Upper |
| T6                                                                                                                                                                              | 5/5                                     | -                         | 6/6                     | 6/6                     | 5/6       | 6/9       | 33.4                                                                                                              | <b>16.3</b>     | 8.10  |
| T18                                                                                                                                                                             | -                                       | -                         | 6/6                     | 6/6                     | -         | 2/6       | 62.6                                                                                                              | <b>22.1</b>     | 8.05  |
| T20                                                                                                                                                                             |                                         |                           | 5/5                     | 6/6                     |           | 5/6       | 15.7                                                                                                              | 6.1             | 2.60  |
| HT29                                                                                                                                                                            | 2/2                                     | 3/3                       | 4/4                     | 3/3                     | -         | -         | 214                                                                                                               | 1               | 1     |
| HCT-116                                                                                                                                                                         | 4/4                                     | -                         | 4/6                     | 3/4                     | -         | -         | 1311                                                                                                              | 520             | 206   |
