# Supplementary material for: What Do We Learn from Spheroid Culture Systems? Insights from Tumorspheres Derived from Primary Colon Cancer Tissue
Source: PubMed Central journal article supplement (PMC4706382; doi:10.1371/journal.pone.0146052), 2016-01-08
Supplement: pone.0146052.s012.pdf [file pone.0146052.s012.pdf]

**S5A Table.**

| T6   |                            |                           |                           |                           |                           |                            |                           |                           |                           |                           |
|------|----------------------------|---------------------------|---------------------------|---------------------------|---------------------------|----------------------------|---------------------------|---------------------------|---------------------------|---------------------------|
| Days | ctrl S vs<br>7.5 $\mu$ M S | ctrl S vs<br>15 $\mu$ M S | ctrl S vs<br>25 $\mu$ M S | ctrl S vs<br>50 $\mu$ M S | ctrl S vs<br>80 $\mu$ M S | ctrl D vs<br>7.5 $\mu$ M D | ctrl D vs<br>15 $\mu$ M D | ctrl D vs<br>25 $\mu$ M D | ctrl D vs<br>50 $\mu$ M D | ctrl D vs 80<br>$\mu$ M D |
| 1    | **                         | *                         | ns                        | ns                        | ns                        | ns                         | ns                        | ns                        | ns                        | ns                        |
| 2    | ns                         | ns                        | ns                        | ns                        | ns                        | **                         | ***                       | ***                       | ***                       | ***                       |
| 3    | ns                         | ns                        | ns                        | ns                        | ns                        | *                          | ***                       | ***                       | ***                       | ***                       |
| 4    | ns                         | ns                        | ns                        | ns                        | ns                        | ***                        | ***                       | ***                       | ***                       | ***                       |
| 5    | ns                         | ns                        | ns                        | ns                        | ns                        | **                         | ***                       | ***                       | ***                       | ***                       |

**S5B Table.**

| T18  |                            |                           |                           |                           |                           |                            |                           |                           |                           |                           |
|------|----------------------------|---------------------------|---------------------------|---------------------------|---------------------------|----------------------------|---------------------------|---------------------------|---------------------------|---------------------------|
| Days | ctrl S vs<br>7.5 $\mu$ M S | ctrl S vs<br>15 $\mu$ M S | ctrl S vs<br>25 $\mu$ M S | ctrl S vs<br>50 $\mu$ M S | ctrl S vs<br>80 $\mu$ M S | ctrl D vs<br>7.5 $\mu$ M D | ctrl D vs<br>15 $\mu$ M D | ctrl D vs<br>25 $\mu$ M D | ctrl D vs<br>50 $\mu$ M D | ctrl D vs<br>80 $\mu$ M D |
| 1    | ns                         | ns                        | ns                        | ns                        | ns                        | ns                         | ns                        | ns                        | ns                        | ns                        |
| 2    | ns                         | ns                        | ns                        | ns                        | ns                        | ns                         | ns                        | *                         | ns                        | ns                        |
| 3    | ns                         | ns                        | ns                        | ns                        | ns                        | ***                        | ***                       | ***                       | ***                       | ***                       |
| 4    | ns                         | ns                        | ns                        | ***                       | ***                       | **                         | ***                       | ***                       | ***                       | ***                       |
| 5    | *                          | ***                       | ***                       | ***                       | ***                       | ***                        | ***                       | ***                       | ***                       | ***                       |

**S5C Table.**

| T20  |                            |                           |                           |                           |                           |                            |                           |                           |                           |                           |
|------|----------------------------|---------------------------|---------------------------|---------------------------|---------------------------|----------------------------|---------------------------|---------------------------|---------------------------|---------------------------|
| Days | ctrl S vs<br>7.5 $\mu$ M S | ctrl S vs<br>15 $\mu$ M S | ctrl S vs<br>25 $\mu$ M S | ctrl S vs<br>50 $\mu$ M S | ctrl S vs<br>80 $\mu$ M S | ctrl D vs<br>7.5 $\mu$ M D | ctrl D vs<br>15 $\mu$ M D | ctrl D vs<br>25 $\mu$ M D | ctrl D vs<br>50 $\mu$ M D | ctrl D vs<br>80 $\mu$ M D |
| 1    | ns                         | ns                        | ns                        | ns                        | ns                        | ns                         | ns                        | ns                        | ns                        | ns                        |
| 2    | ns                         | ns                        | ns                        | ns                        | ns                        | ns                         | ns                        | ***                       | ***                       | ***                       |
| 3    | ns                         | ns                        | ns                        | ns                        | ***                       | *                          | ***                       | ***                       | ***                       | ***                       |
| 4    | ns                         | ns                        | **                        | ***                       | ***                       | ***                        | ***                       | ***                       | ***                       | ***                       |
| 5    | ns                         | ns                        | **                        | ***                       | ***                       | ***                        | ***                       | ***                       | ***                       | ***                       |

**S5D Table.**

| HT29 |                            |                           |                           |                           |                           |                            |                           |                           |                           |                           |
|------|----------------------------|---------------------------|---------------------------|---------------------------|---------------------------|----------------------------|---------------------------|---------------------------|---------------------------|---------------------------|
| Days | ctrl S vs<br>7.5 $\mu$ M S | ctrl S vs<br>15 $\mu$ M S | ctrl S vs<br>25 $\mu$ M S | ctrl S vs<br>50 $\mu$ M S | ctrl S vs<br>80 $\mu$ M S | ctrl D vs<br>7.5 $\mu$ M D | ctrl D vs<br>15 $\mu$ M D | ctrl D vs<br>25 $\mu$ M D | ctrl D vs<br>50 $\mu$ M D | ctrl D vs<br>80 $\mu$ M D |
| 1    | ns                         | ns                        | ns                        | ns                        | ns                        | ns                         | ns                        | ns                        | ns                        | ns                        |
| 2    | ns                         | ns                        | ns                        | ns                        | ns                        | ns                         | ns                        | ns                        | ***                       | ***                       |
| 3    | ns                         | ns                        | *                         | ***                       | ***                       | ***                        | ***                       | ***                       | ***                       | ***                       |
| 4    | ns                         | *                         | ***                       | ***                       | ***                       | ***                        | ***                       | ***                       | ***                       | ***                       |
| 5    | ns                         | ***                       | ***                       | ***                       | ***                       | ***                        | ***                       | ***                       | ***                       | ***                       |

**S5E Table. Percentages of colony formation in T6 SC and differentiated counterpart**

| Cell doses | 250              | 100               | 50              | 20              |
|------------|------------------|-------------------|-----------------|-----------------|
| T6-D       | 55.2 $\pm$ 1.13% | 54 $\pm$ 8.49%    | 64 $\pm$ 11.31% | 55 $\pm$ 21.21% |
| T6-S       | 63.2 $\pm$ 5.66% | 73.5 $\pm$ 3.54%  | 70 $\pm$ 5.66%  | 65 $\pm$ 14.14% |
| T6-D + 5FU | 25.4 $\pm$ 1.98% | 48 $\pm$ 5.66%    | 29 $\pm$ 1.41%  | 55 $\pm$ 7.07%  |
| T6-S + 5FU | 61.4 $\pm$ 1.98% | 60.5 $\pm$ 13.44% | 67 $\pm$ 9.90%  | 45 $\pm$ 14.14% |

**S5F Table. Percentages of colony formation in HT29 SC and differentiated counterpart**

| Cell doses   | 250              | 100              | 50              | 20               |
|--------------|------------------|------------------|-----------------|------------------|
| HT29-D       | 53.4 $\pm$ 2.55% | 52 $\pm$ 4.24%   | 51 $\pm$ 12.73% | 65 $\pm$ 14.14%  |
| HT29-S       | 61.2 $\pm$ 3.39% | 61.5 $\pm$ 3.54% | 77 $\pm$ 7.07%  | 67.5 $\pm$ 3.54% |
| HT29-D + 5FU | 24.8 $\pm$ 2.26% | 29 $\pm$ 1.41%   | 31 $\pm$ 9.90%  | 37.5 $\pm$ 3.54% |
| HT29-S + 5FU | 51.4 $\pm$ 3.11% | 62 $\pm$ 2.83%   | 71 $\pm$ 9.90%  | 60 $\pm$ 14.14%  |
