# Supplementary material for: What Do We Learn from Spheroid Culture Systems? Insights from Tumorspheres Derived from Primary Colon Cancer Tissue
Source: PubMed Central journal article supplement (PMC4706382; doi:10.1371/journal.pone.0146052), 2016-01-08
Supplement: pone.0146052.s013.pdf [file pone.0146052.s013.pdf]

**S6 Table. Genes from the 8-gene signature and their functions.**

| Gene name            | Known function                                     | Cancer type                                    | References |
|----------------------|----------------------------------------------------|------------------------------------------------|------------|
| <i>HSD17B7, NEBL</i> | tumor growth                                       | breast, AML                                    | (1,2)      |
| <i>FAM46C</i>        | poor disease-free survival                         | myeloma                                        | (3,4)      |
| <i>FGFBP1</i>        | tumor initiation,<br>metastasis, poor<br>prognosis | pancreas, colon,<br>gallbladder, breast, liver | (5–8)      |
| <i>IDI1</i>          | chemoresistance                                    | ovarian                                        | (9)        |
| <i>CDA</i>           | tumor growth,<br>chemoresistance                   | breast                                         | (10–14)    |
| <i>GSTA4</i>         | chemoresistance                                    | breast, ovarian                                | (15,16)    |
| <i>PRR15L</i>        | unknown                                            | -                                              | -          |
